# Supplementary material
Source: Springer Nature journal article supplement (https://www.springermedizin.de/resource/supplementary/12885_2012_3562_MOESM7_ESM.pdf/9463982)

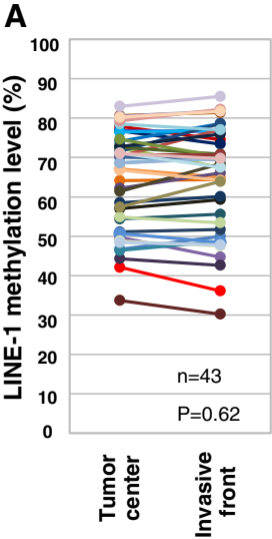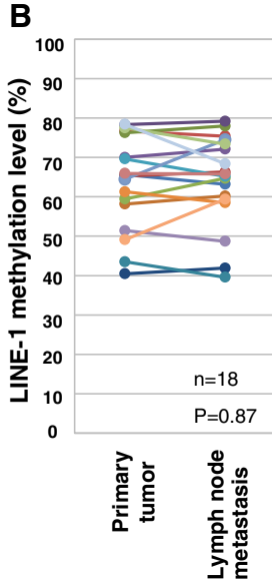

Supplement: MOESM7 [file 9463982]
